# Supplementary material for: pH- and Thermo-Responsive Water-Soluble Smart Polyion Complex (PIC) Vesicle with Polyampholyte Shells
Source: MDPI journal article supplement (doi:10.3390/polym14091659), 2022-04-20
Supplement: s1 [file s1]

## Supplementary Materials

### **pH- and Thermo-Responsive Water-Soluble Smart Polyion Complex (PIC) Vesicle with Polyampholyte Shells**

Thu Thao Pham<sup>1</sup>, Tien Duc Pham<sup>2</sup>, and Shin-ichi Yusa<sup>1\*</sup>

<sup>1</sup>Department of Applied Chemistry, Graduate School of Engineering, University of Hyogo, 2167 Shosha, Himeji, Hyogo 671-2280, Japan

<sup>2</sup>Faculty of Chemistry, University of Science, Vietnam National University, Hanoi, 19 Le Thanh Tong, Hoan Kiem, Hanoi 100000, Vietnam

\*Corresponding author

Shin-ichi Yusa

yusa@eng.u-hyogo.ac.jp

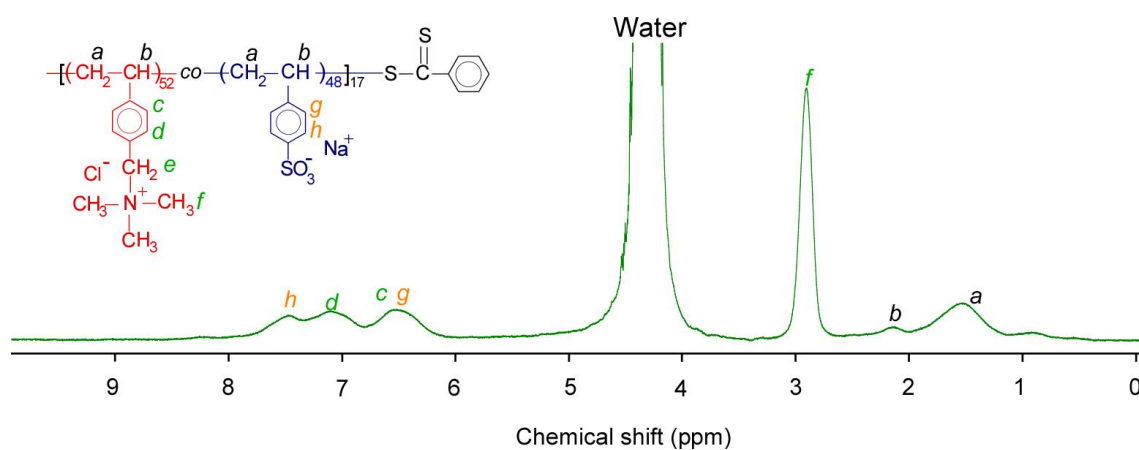

**Figure S1.**  $^1\text{H}$  NMR spectrum for  $P(VBTAC/NaSS)_{17}$  in  $\text{D}_2\text{O}$  containing 1.2-M NaCl at 70 °C.

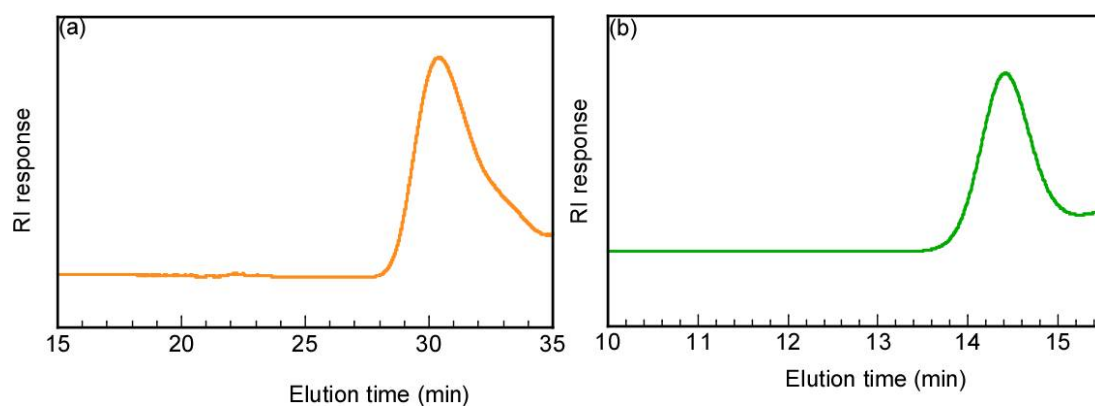

**Figure S2.** Gel-permeation chromatography (GPC) elution curves for (a)  $P(VS)_{17}A_{50}$  and (b)  $PAAc_{49}$  monitored with refractive index (RI) detector working at 40 °C.

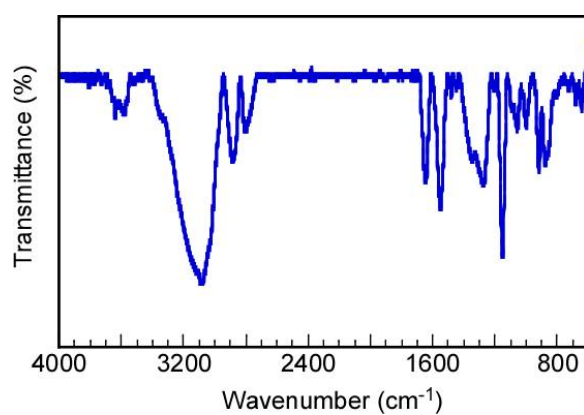

**Figure S3.** FTIR spectrum for P(VS)<sub>17</sub>A<sub>50</sub>.

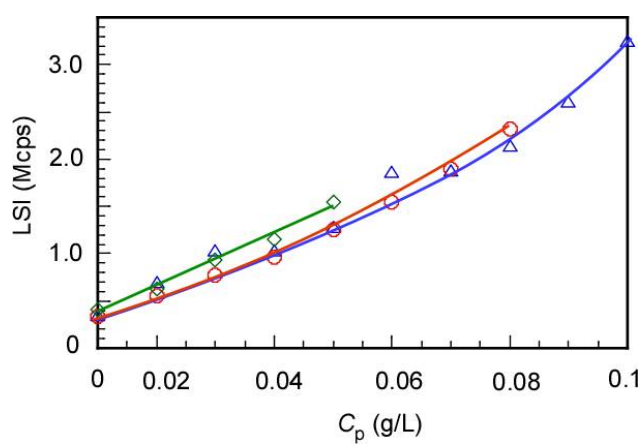

**Figure S4.** Light scattering intensity (LSI) for the P(VS)<sub>17</sub>A<sub>50</sub>/PAAc<sub>49</sub> PIC vesicles with  $f^+ = 0.5$  in water at pH 10 as a function of polymer concentration after mixing P(VS)<sub>17</sub>A<sub>50</sub> and PAAc<sub>49</sub>. At 25 °C the PIC aggregates solution at 0.1 (triangle), 0.08 (circle), and 0.05 (diamond) g/L were diluted with pH 10 aqueous solution.

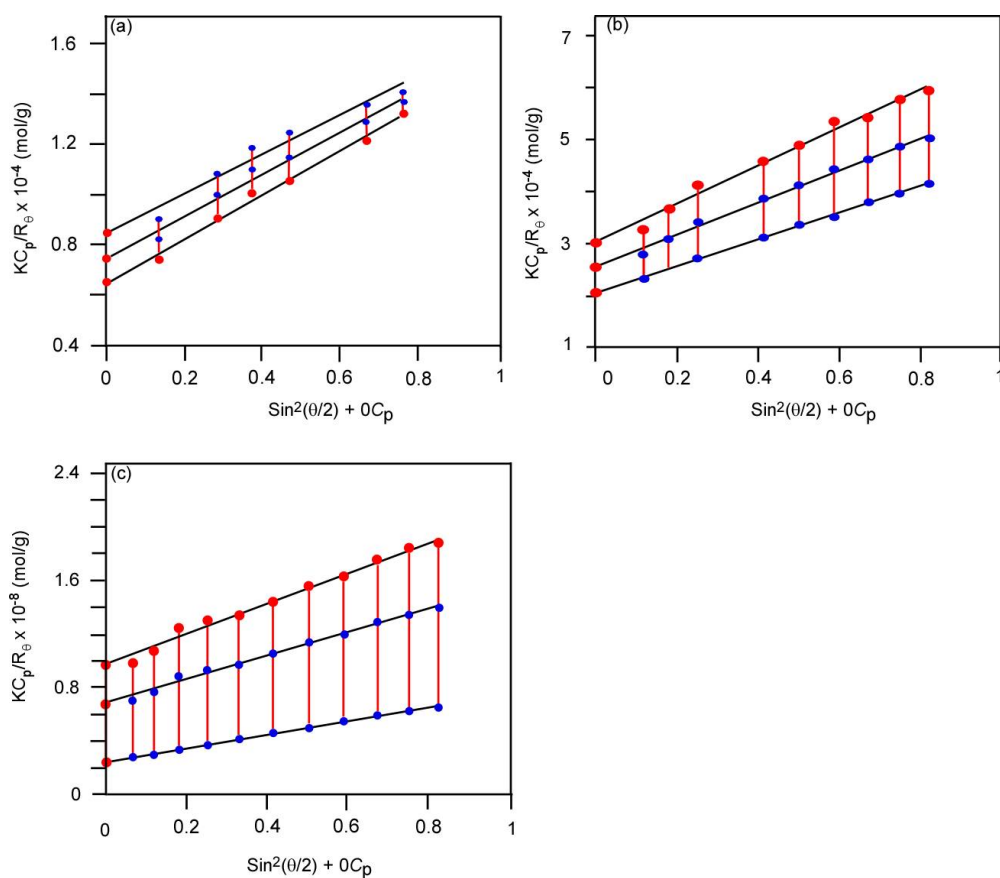

**Figure S5.** Typical examples of Zimm plots for (a) P(VS)<sub>17</sub>, (b) PAAc<sub>49</sub>, and (c) the P(VS)<sub>17</sub>A<sub>50</sub>/PAAc<sub>49</sub> PIC vesicle with  $f^+ = 0.5$  in aqueous solutions at pH 10.

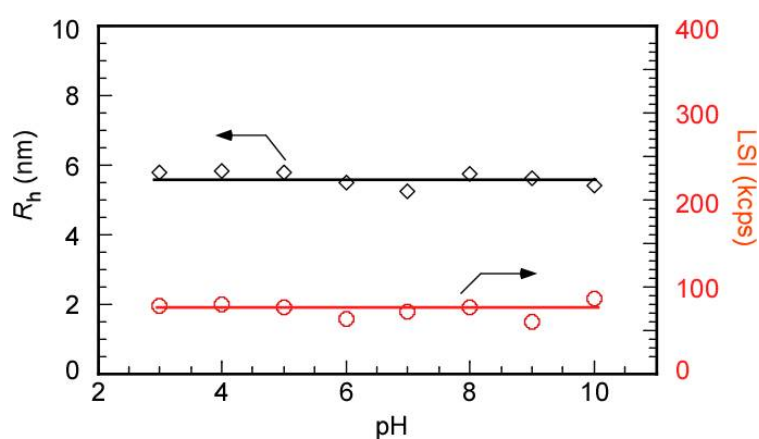

**Figure S6.** Hydrodynamic radius ( $R_h$ , diamond) and light scattering intensity (LSI, circle) for P(VS)<sub>17</sub>A<sub>50</sub> at  $C_p = 2.0 \text{ g/L}$  in water as a function of pH at 25 °C.

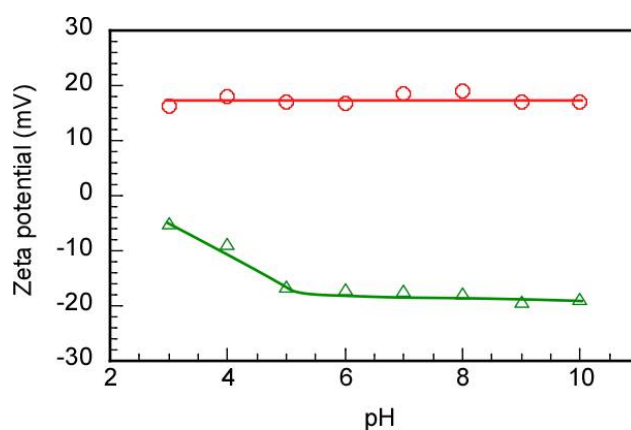

**Figure S7.** Zeta-potential for P(VS)<sub>17</sub>A<sub>50</sub> (circle) and PAAc<sub>49</sub> (triangle) in water at  $C_p = 2.0$  g/L as a function of pH at 25 °C.

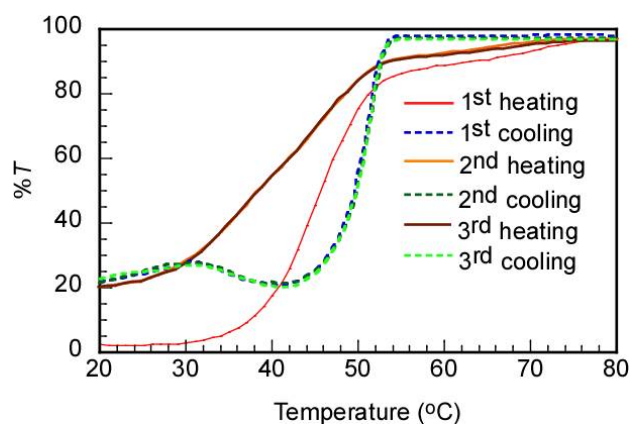

**Figure S8.** Percent transmittance (% $T$ ) at 700 nm for the 0.1-M NaCl aqueous P(VS)<sub>17</sub> solution at  $C_p = 1.0$  g/L as a function of temperature upon the heating and cooling processes.

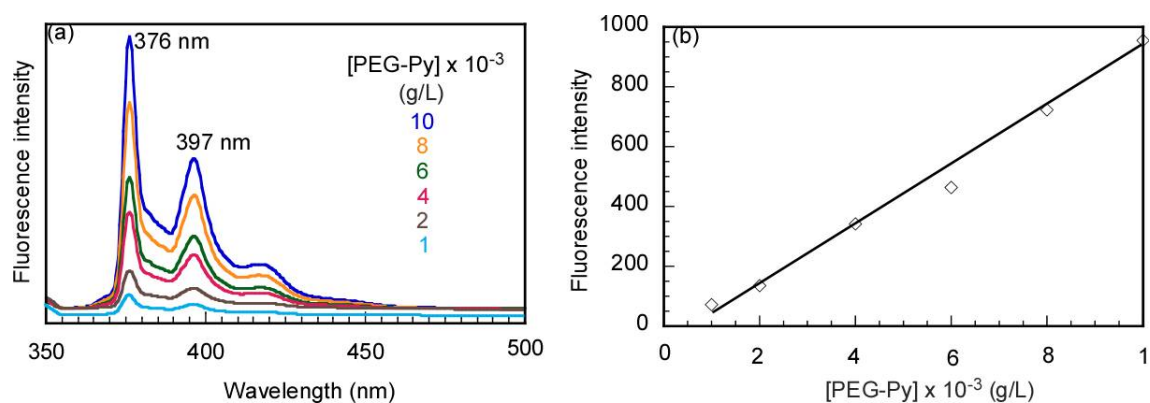

**Figure S9.** (a) Fluorescence spectra for PEG-Py in water at pH 10 excited at 334 nm at various PEG-Py concentrations ([PEG-Py]) and (b) a calibration curve of fluorescence intensity at 376 nm using [PEG-Py] in water at pH 10.
